# Supplementary material for: OCT4 expression mediates partial cardiomyocyte reprogramming of mesenchymal stromal cells
Source: PubMed Central journal article supplement (PMC5720736; doi:10.1371/journal.pone.0189131), 2017-12-07
Supplement: pone.0189131.s002.pdf [file pone.0189131.s002.pdf]

**Supplementary Table 1. DNA primer sequences.**

| <b>Primer name</b>                      | <b>Sequence</b>           |
|-----------------------------------------|---------------------------|
| <i>Gene expression</i>                  |                           |
| Nkx2.5 forward <sup>1</sup>             | ATGCCTATGGCTACAACGC       |
| Nkx2.5 reverse <sup>1</sup>             | ACTCACTTTAATGGGAAGAGGG    |
| ANF forward <sup>1</sup>                | TTGGCTTCCAGGCCATAATTG     |
| ANF reverse <sup>1</sup>                | AAGAGGGCAGATCTATCGGA      |
| $\alpha$ -CA forward <sup>1</sup>       | TGTTACGTCGCCTTGGATTTTGAG  |
| $\alpha$ -CA reverse <sup>1</sup>       | AAGAGAGAGACATATCAGAAGC    |
| OCT4 forward                            | CAATGCCGTGAAGTTGGAG       |
| OCT4 reverse                            | CCAAGGTGATCCTCTTCTGC      |
| SOX2 forward                            | ACATGTGAGGGCTGGACTG       |
| SOX2 reverse                            | CGTTTCGCTGCGGAGAT         |
| NANOG forward                           | TCTGGGAACGCCTCATCA        |
| NANOG reverse                           | AGAGGCAGGTCTTCAGAGGAA     |
| GAPDH forward                           | ATGGTGAAGGTCGGTGTGA       |
| GAPDH reverse                           | CTCCACTTTGCCACTGCAA       |
| <i>Bisulfite sequencing<sup>2</sup></i> |                           |
| OCT4-out forward                        | GAGGATTGGAGGTGTAATGGTTGTT |
| OCT4-out reverse                        | CTACTAACCCATCACCCCCACCTA  |
| OCT4-in forward                         | TGGGTTGAAATATTGGGTTTATTT  |
| OCT4-in reverse                         | CTAAAACCAAATATCCAACCATA   |

<sup>1</sup> Rose et al., Stem Cells 2008;26(11):2884-92.

<sup>2</sup> Gao et al., Cell Stem Cell 2013;12(4):453-69.
